# Supplementary material for: Subclinical effects of remote ischaemic conditioning in human kidney transplants revealed by quantitative proteomics
Source: PubMed Central journal article supplement (PMC7607690; doi:10.1186/s12014-020-09301-x), 2020-11-02

# Table S2: Altered kidney tissue proteome profiles in RIC vs non-RIC

| Gene Names  | Protein Names                                                               | Baseline (RIC vs non-RIC) |                    | Day 6 (RIC vs non-RIC) |                    |
|-------------|-----------------------------------------------------------------------------|---------------------------|--------------------|------------------------|--------------------|
|             |                                                                             | LOG (P-value)             | Log2 (fold change) | LOG (P-value)          | Log2 (fold change) |
| MB          | Myoglobin                                                                   |                           |                    | 1.54                   | 6.82               |
| HTR1F       | 5-hydroxytryptamine receptor 1F                                             |                           |                    | 2.45                   | 5.63               |
| ACTA1       | Actin, alpha skeletal muscle                                                |                           |                    | 1.32                   | 4.18               |
| HAO2        | Hydroxyacid oxidase 2                                                       |                           |                    | 1.59                   | 3.44               |
| XPNPEP2     | Xaa-Pro aminopeptidase 2                                                    |                           |                    | 1.86                   | 2.83               |
| MYOM1       | Myomesin-1                                                                  |                           |                    | 1.40                   | 2.76               |
| MRRF        | Ribosome-recycling factor, mitochondrial                                    |                           |                    | 1.31                   | 2.57               |
| PEBP4       | Phosphatidylethanolamine-binding protein 4                                  |                           |                    | 1.67                   | 2.42               |
| ATP2A2      | Sarcoplasmic/endoplasmic reticulum calcium ATPase 2                         |                           |                    | 2.12                   | 2.35               |
| MTCH2       | Mitochondrial carrier homolog 2                                             |                           |                    | 1.38                   | 2.34               |
| APOC1       | Apolipoprotein C-1                                                          |                           |                    | 1.33                   | 2.27               |
| ALDH8A1     | Aldehyde dehydrogenase family 8 member A1                                   |                           |                    | 2.09                   | 2.24               |
| MTHFS       | 5-formyltetrahydrofolate cyclo-ligase                                       |                           |                    | 1.58                   | 2.19               |
| TRIM72      | Tripartite motif-containing protein 72                                      |                           |                    | 1.95                   | 2.18               |
| PIR         | Pirin                                                                       |                           |                    | 1.58                   | 2.15               |
| DDX49       | Probable ATP-dependent RNA helicase DDX49                                   |                           |                    | 1.48                   | 2.15               |
| NEXN        | Nexilin                                                                     |                           |                    | 1.30                   | 2.07               |
| CRAT        | Carnitine O-acetyltransferase                                               |                           |                    | 2.09                   | 2.07               |
| IARS2       | Isoleucine-tRNA ligase, mitochondrial                                       |                           |                    | 2.35                   | 2.00               |
| SBDS        | Ribosome maturation protein SBDS                                            |                           |                    | 1.77                   | 1.95               |
| CFD         | Complement factor D                                                         |                           |                    | 1.36                   | 1.90               |
| IDH3G       | Isocitrate dehydrogenase [NAD] subunit                                      |                           |                    | 1.42                   | 1.88               |
| PPBP        | Platelet basic protein                                                      |                           |                    | 1.65                   | 1.81               |
| SLC4A1      | Band 3 anion transport protein                                              |                           |                    | 2.53                   | 1.79               |
| MYL6        | Myosin light polypeptide 6                                                  |                           |                    | 1.51                   | 1.77               |
| RP59        | 40S ribosomal protein S9                                                    |                           |                    | 1.58                   | 1.57               |
| EHD1        | EH domain-containing protein 1                                              |                           |                    | 1.33                   | 1.56               |
| PGRMC2      | Membrane-associated progesterone receptor component 2                       |                           |                    | 1.31                   | 1.47               |
| MYO5B       | Unconventional myosin-Vb                                                    |                           |                    | 2.41                   | 1.45               |
| ERO1L       | ERO1-like protein alpha                                                     |                           |                    | 3.01                   | 1.42               |
| QARS        | Glutamine-tRNA ligase                                                       |                           |                    | 1.96                   | 1.40               |
| RP52        | 40S ribosomal protein S2                                                    |                           |                    | 1.87                   | 1.39               |
| SLC3A1      | Neutral and basic amino acid transport protein rBAT                         |                           |                    | 1.41                   | 1.31               |
| FREM2       | FRAS1-related extracellular matrix protein 2                                |                           |                    | 1.62                   | 1.29               |
| NPEPP5      | Puromycin-sensitive aminopeptidase                                          |                           |                    | 1.35                   | 1.22               |
| ANKS4B      | Ankyrin repeat and SAM domain-containing protein 4B                         |                           |                    | 1.81                   | 1.17               |
| EPS8        | Epidermal growth factor receptor kinase substrate 8                         |                           |                    | 1.79                   | 1.16               |
| RP516       | 40S ribosomal protein S16                                                   |                           |                    | 2.14                   | 1.16               |
| DNAJA1      | DnaJ homolog subfamily A member 1                                           |                           |                    | 2.64                   | 1.02               |
| VP537B      | Vacuolar protein sorting-associated protein 37B                             |                           |                    | 1.32                   | -1.01              |
| CROCC       | Rootletin                                                                   |                           |                    | 1.30                   | -1.05              |
| PDCD4       | Programmed cell death protein 4                                             |                           |                    | 1.32                   | -1.11              |
| SOD3        | Extracellular superoxide dismutase [Cu-Zn]                                  |                           |                    | 1.61                   | -1.12              |
| SSBP1       | Single-stranded DNA-binding protein, mitochondrial                          |                           |                    | 2.39                   | -1.15              |
| PEA15       | Astrocytic phosphoprotein PEA-15                                            |                           |                    | 2.45                   | -1.18              |
| FBXO2       | F-box only protein 2                                                        |                           |                    | 1.56                   | -1.25              |
| RBBP7       | Histone-binding protein RBBP7                                               |                           |                    | 1.73                   | -1.31              |
| EIF4EBP2    | Eukaryotic translation initiation factor 4E-binding protein 2               |                           |                    | 1.56                   | -1.31              |
| FABP4       | Fatty acid-binding protein, adipocyte                                       |                           |                    | 1.41                   | -1.38              |
| PDDC1       | Parkinson disease 7 domain-containing protein 1                             |                           |                    | 1.53                   | -1.44              |
| EML2        | Echinoderm microtubule-associated protein-like 2                            |                           |                    | 1.49                   | -1.45              |
| ACAN        | Aggrecan core protein/Aggrecan core protein 2                               |                           |                    | 1.50                   | -1.46              |
| PCDH1       | Protocadherin-1                                                             |                           |                    | 2.73                   | -1.53              |
| TRIP6       | Thyroid receptor-interacting protein 6                                      |                           |                    | 1.53                   | -1.68              |
| SRRM2       | Serine/arginine repetitive matrix protein 2                                 |                           |                    | 1.41                   | -1.74              |
| UTRN        | Utrophin                                                                    |                           |                    | 1.48                   | -1.77              |
| CDKN1B      | Cyclin-dependent kinase inhibitor 1B                                        |                           |                    | 1.86                   | -1.92              |
| NDUFAF3     | NADH dehydrogenase [ubiquinone] 1 alpha subcomplex assembly factor 3        |                           |                    | 1.96                   | -2.03              |
| COA7        | Cytochrome c oxidase assembly factor 7                                      |                           |                    | 1.39                   | -2.08              |
| UBQLN2      | Ubiquilin-2                                                                 |                           |                    | 2.75                   | -2.44              |
| SGSH        | N-sulphoglucosamine sulphohydrolase                                         |                           |                    | 3.31                   | -2.80              |
| COL5A1      | Collagen alpha-1(V) chain                                                   |                           |                    | 2.02                   | -3.10              |
| RP57        | 40S ribosomal protein S7                                                    | 1.55                      | 2.56               |                        |                    |
| TYMP        | Thymidine phosphorylase                                                     | 2.00                      | 2.39               |                        |                    |
| RPL17       | 60S ribosomal protein L17                                                   | 1.85                      | 2.08               |                        |                    |
| OLFM13      | Olfactomedin-like protein 3                                                 | 1.84                      | 1.75               |                        |                    |
| MRPL40      | 39S ribosomal protein L40, mitochondrial                                    | 1.32                      | 1.67               |                        |                    |
| RPL35       | 60S ribosomal protein L35                                                   | 1.45                      | 1.61               |                        |                    |
| PEBP4       | Phosphatidylethanolamine-binding protein 4                                  | 1.61                      | 1.54               |                        |                    |
| SCO2        | Protein SCO2 homolog, mitochondrial                                         | 2.02                      | 1.52               |                        |                    |
| COX7C       | Cytochrome c oxidase subunit 7C, mitochondrial                              | 2.34                      | 1.42               |                        |                    |
| RBMS1;RBMS3 | RNA-binding motif, single-stranded-interacting protein 1                    | 1.44                      | 1.33               |                        |                    |
| EEF1A2      | Elongation factor 1-alpha 2                                                 | 2.22                      | 1.31               |                        |                    |
| UGT2A3      | UDP-glucuronosyltransferase 2A3                                             | 1.33                      | 1.18               |                        |                    |
| CORO1A      | Coronin-1A/Coronin                                                          | 1.39                      | 1.18               |                        |                    |
| NUP35       | Nucleoporin NUP53                                                           | 1.74                      | 1.12               |                        |                    |
| RPL13       | 60S ribosomal protein L13                                                   | 1.45                      | 1.11               |                        |                    |
| ADPRHL2     | Poly(ADP-ribose) glycohydrolase ARH3                                        | 1.43                      | -1.02              |                        |                    |
| GBA         | Glucosylceramidase                                                          | 1.67                      | -1.03              |                        |                    |
| C1RL        | Complement C1r subcomponent-like protein                                    | 1.41                      | -1.04              |                        |                    |
| ANKRD2      | Ankyrin repeat domain-containing protein 2                                  | 1.43                      | -1.08              |                        |                    |
| MROH2B      | Maestro heat-like repeat-containing protein family member 2B                | 1.63                      | -1.18              |                        |                    |
| MECR        | Trans-2-enoyl-CoA reductase, mitochondrial                                  | 1.36                      | -1.25              |                        |                    |
| ARF4        | ADP-ribosylation factor 4                                                   | 1.37                      | -1.30              |                        |                    |
| GNAI3       | Guanine nucleotide-binding protein G(k) subunit alpha                       | 1.53                      | -1.30              |                        |                    |
| VAMP8       | Vesicle-associated membrane protein 8                                       | 1.45                      | -1.88              |                        |                    |
| NDUFC2      | NADH dehydrogenase [ubiquinone] 1 subunit C2                                | 1.32                      | -1.92              |                        |                    |
| TUBA1C      | Tubulin alpha-1C chain                                                      | 1.30                      | -2.12              |                        |                    |
| DDX49       | Probable ATP-dependent RNA helicase DDX49                                   | 1.33                      | -2.13              |                        |                    |
| NDUFB11     | NADH dehydrogenase [ubiquinone] 1 beta subcomplex subunit 11, mitochondrial | 1.43                      | -2.55              |                        |                    |
| MB          | Myoglobin                                                                   | 1.54                      | -2.55              |                        |                    |
| KRT13       | Myoglobin                                                                   | 1.32                      | -3.77              |                        |                    |

Relative protein abundance

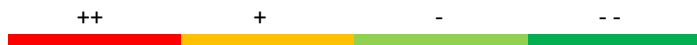

Supplement: 12014_2020_9301_MOESM2_ESM.pdf [file 12014_2020_9301_MOESM2_ESM.pdf]
