# Supplementary material for: Subclinical effects of remote ischaemic conditioning in human kidney transplants revealed by quantitative proteomics
Source: PubMed Central journal article supplement (PMC7607690; doi:10.1186/s12014-020-09301-x), 2020-11-02

**Table S3: Altered plasma proteome profiles in RIC vs non-RIC**

| Gene Name              | Non-RIC 90min vs TD0 |                    | Non-RIC TD1 vs TD0 |                    | Non-RIC TD5 vs TD0 |                    | RIC 90min v T0 |                    | RIC TD1vs TD0  |                    | RIC TD5 vs TD0 |                    |
|------------------------|----------------------|--------------------|--------------------|--------------------|--------------------|--------------------|----------------|--------------------|----------------|--------------------|----------------|--------------------|
|                        | -LOG (P value)       | Log2 (fold change) | -LOG (P value)     | Log2 (fold change) | -LOG (P value)     | Log2 (fold change) | -LOG (P value) | Log2 (fold change) | -LOG (P value) | Log2 (fold change) | -LOG (P value) | Log2 (fold change) |
| SAA1                   |                      |                    | 2.51               | 7.22               | 2.91               | 8.10               |                |                    | 4.02           | 4.83               | 3.91           | 4.45               |
| SAA2                   |                      |                    | 2.97               | 7.02               | 3.48               | 7.02               |                |                    | 3.64           | 4.78               | 3.24           | 4.62               |
| CRP                    |                      |                    | 4.19               | 5.88               | 3.65               | 5.12               |                |                    | 2.21           | 4.47               | 1.51           | 4.24               |
| SERPINA7               |                      |                    |                    |                    | 1.42               | 2.77               |                |                    |                |                    |                |                    |
| F5                     |                      |                    | 1.36               | 1.87               | 1.87               | 2.69               |                |                    |                |                    |                |                    |
| YWHAZ                  |                      |                    |                    |                    | 1.94               | 2.43               |                |                    |                |                    | 1.76           | 2.50               |
| PLEK                   | 1.62                 | 1.40               | 1.96               | 2.20               | 2.03               | 2.39               |                |                    |                |                    |                |                    |
| IGLC7                  |                      |                    |                    |                    | 1.34               | 2.33               | 1.92           | 1.09               |                |                    |                |                    |
| TLN1                   |                      |                    |                    |                    | 1.54               | 2.11               |                |                    |                |                    |                |                    |
| RAP1B;RAP1A            | 2.34                 | 1.69               | 2.10               | 1.73               | 2.90               | 2.06               |                |                    |                |                    |                |                    |
| PPIA                   |                      |                    |                    |                    | 1.62               | 2.03               |                |                    |                |                    | 1.84           | 1.90               |
| FCGBP                  |                      |                    |                    |                    | 2.58               | 1.91               |                |                    |                |                    |                |                    |
| FLNA                   |                      |                    |                    |                    | 1.36               | 1.77               |                |                    |                |                    |                |                    |
| VCL                    |                      |                    |                    |                    | 1.87               | 1.76               |                |                    |                |                    | 1.67           | 2.18               |
| PFN1                   |                      |                    | 1.46               | 1.71               | 2.21               | 1.65               |                |                    |                |                    |                |                    |
| SERPINA3               |                      |                    | 2.68               | 1.20               | 4.54               | 1.64               |                |                    |                |                    | 3.78           | 1.42               |
| ACTA1;ACT1;ACTG2;ACTA2 |                      |                    |                    |                    | 1.56               | 1.45               |                |                    |                |                    |                |                    |
| SAA2-SAA4;SAA4         |                      |                    | 1.44               | 1.17               | 1.84               | 1.35               |                |                    |                |                    |                |                    |
| ACTG1;ACTB             |                      |                    |                    |                    | 1.85               | 1.22               |                |                    |                |                    | 1.71           | 1.12               |
| ITIH3                  |                      |                    |                    |                    | 1.93               | 1.17               |                |                    |                |                    |                |                    |
| HP                     |                      |                    |                    |                    | 2.96               | 1.04               |                |                    |                |                    |                |                    |
| LRG1                   |                      |                    | 3.67               | 1.03               | 4.00               | 1.03               |                |                    |                |                    |                |                    |
| C9                     |                      |                    |                    |                    | 3.10               | 1.02               |                |                    |                |                    |                |                    |
| SIGLEC16               |                      |                    |                    |                    | 1.85               | -1.02              |                |                    |                |                    |                |                    |
| TNC                    |                      |                    |                    |                    | 1.35               | -1.14              |                |                    |                |                    |                |                    |
| CFD                    |                      |                    | 1.38               | -1.32              | 1.90               | -1.89              |                |                    |                |                    |                |                    |
| MED1                   |                      |                    |                    |                    | 1.57               | -2.09              |                |                    |                |                    |                |                    |
| FGA                    |                      |                    |                    |                    | 1.42               | -2.34              |                |                    |                |                    |                |                    |
| PTGDS                  |                      |                    |                    |                    | 1.54               | -2.66              |                |                    |                |                    |                |                    |
| CAP1                   |                      |                    | 1.63               | 2.36               |                    |                    |                |                    |                |                    | 2.16           | 1.88               |
| CD14                   |                      |                    | 1.93               | 1.15               |                    |                    |                |                    |                |                    |                |                    |
| GPX3                   |                      |                    | 1.38               | 1.56               |                    |                    |                |                    |                |                    | 1.38           | 2.42               |
| HBA1;HBA2              |                      |                    | 1.86               | -1.48              |                    |                    |                |                    | 2.08           | -1.20              |                |                    |
| HBB                    |                      |                    | 2.91               | -1.68              |                    |                    |                |                    | 1.61           | -1.14              |                |                    |
| HBD                    |                      |                    | 1.39               | -1.22              |                    |                    |                |                    |                |                    |                |                    |
| IGFBP6                 |                      |                    | 2.38               | -1.65              |                    |                    |                |                    |                |                    |                |                    |
| ILK                    |                      |                    | 1.43               | 1.98               |                    |                    |                |                    |                |                    |                |                    |
| LBP                    |                      |                    | 1.89               | 2.37               |                    |                    |                |                    |                |                    |                |                    |
| NID1                   |                      |                    | 3.10               | 1.84               |                    |                    |                |                    |                |                    |                |                    |
| PLA2G7                 | 2.20                 | 2.75               | 1.54               | 2.07               |                    |                    |                |                    |                |                    |                |                    |
| PLTP                   |                      |                    | 1.73               | 1.40               |                    |                    |                |                    |                |                    |                |                    |
| PRSS2                  |                      |                    | 1.69               | 1.52               |                    |                    |                |                    |                |                    |                |                    |
| TAGLN2                 |                      |                    | 1.60               | 3.03               |                    |                    |                |                    |                |                    |                |                    |
| TUBB1                  |                      |                    | 1.49               | 1.47               |                    |                    |                |                    |                |                    |                |                    |
| BTD                    | 1.64                 | 1.38               |                    |                    |                    |                    |                |                    |                |                    |                |                    |
| REG3A                  |                      |                    |                    |                    |                    |                    | 1.87           | -2.06              |                |                    |                |                    |
| SEPP1                  |                      |                    |                    |                    |                    |                    | 1.37           | -2.33              |                |                    |                |                    |
| RNH1                   |                      |                    |                    |                    |                    |                    |                |                    | 1.47           | 1.80               |                |                    |
| SOD1                   |                      |                    |                    |                    |                    |                    |                |                    | 1.52           | 1.52               |                |                    |
| VWF                    |                      |                    |                    |                    |                    |                    |                |                    | 2.01           | 2.35               | 2.61           | 3.51               |
| ACTN1;ACTN4            |                      |                    |                    |                    |                    |                    |                |                    |                |                    | 1.47           | 1.75               |
| CEP290                 |                      |                    |                    |                    |                    |                    |                |                    |                |                    | 1.66           | -2.67              |
| ENO1                   |                      |                    |                    |                    |                    |                    |                |                    |                |                    | 1.46           | 1.39               |
| FERMT3                 |                      |                    |                    |                    |                    |                    |                |                    |                |                    | 2.01           | 1.91               |
| FGL1                   |                      |                    |                    |                    |                    |                    |                |                    |                |                    | 1.49           | 1.20               |
| MYL9                   |                      |                    |                    |                    |                    |                    |                |                    |                |                    | 1.56           | 2.47               |
| PF4;PF4V1              |                      |                    |                    |                    |                    |                    |                |                    |                |                    | 1.76           | 1.43               |
| ZYX                    |                      |                    |                    |                    |                    |                    |                |                    |                |                    | 2.20           | 1.85               |

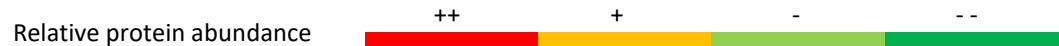

Supplement: 12014_2020_9301_MOESM3_ESM.pdf [file 12014_2020_9301_MOESM3_ESM.pdf]
