# Supplementary material for: Subclinical effects of remote ischaemic conditioning in human kidney transplants revealed by quantitative proteomics
Source: PubMed Central journal article supplement (PMC7607690; doi:10.1186/s12014-020-09301-x), 2020-11-02
Supplement: 12014_2020_9301_MOESM1_ESM.pdf [file 12014_2020_9301_MOESM1_ESM.pdf]

**Table S1: Troponin T and myoglobin levels in plasma**

|                   | RIC                  | Sham RIC             | p    |
|-------------------|----------------------|----------------------|------|
| <b>Troponin T</b> |                      |                      |      |
| Baseline, N=217   | 37 (95% CI 33-42)    | 38 (95% CI 33-43)    | 0.84 |
| 90 min, N=212     | 38 (95% CI 32-42)    | 33 (95% CI 29-38)    | 0.26 |
| Day 1, N=214      | 33 (95% CI 28-39)    | 34 (95% CI 29-40)    | 0.71 |
| <b>Myoglobin</b>  |                      |                      |      |
| Baseline, N=218   | 197 (95% CI 179-218) | 202 (95% CI 183-222) | 0.75 |
| 90 min, N=214     | 268 (95% CI 241-297) | 258 (95% CI 233-286) | 0.57 |
| Day 1, N=214      | 346 (95% CI 297-402) | 389 (95% CI 336-451) | 0.25 |

*Estimated median s-troponin t ng/L and estimated median s-myoglobin µg/L, at baseline, 90 min and post-operative day one. No significant differences were found between the two groups.*
