# Supplementary material for: Subclinical effects of remote ischaemic conditioning in human kidney transplants revealed by quantitative proteomics
Source: PubMed Central journal article supplement (PMC7607690; doi:10.1186/s12014-020-09301-x), 2020-11-02

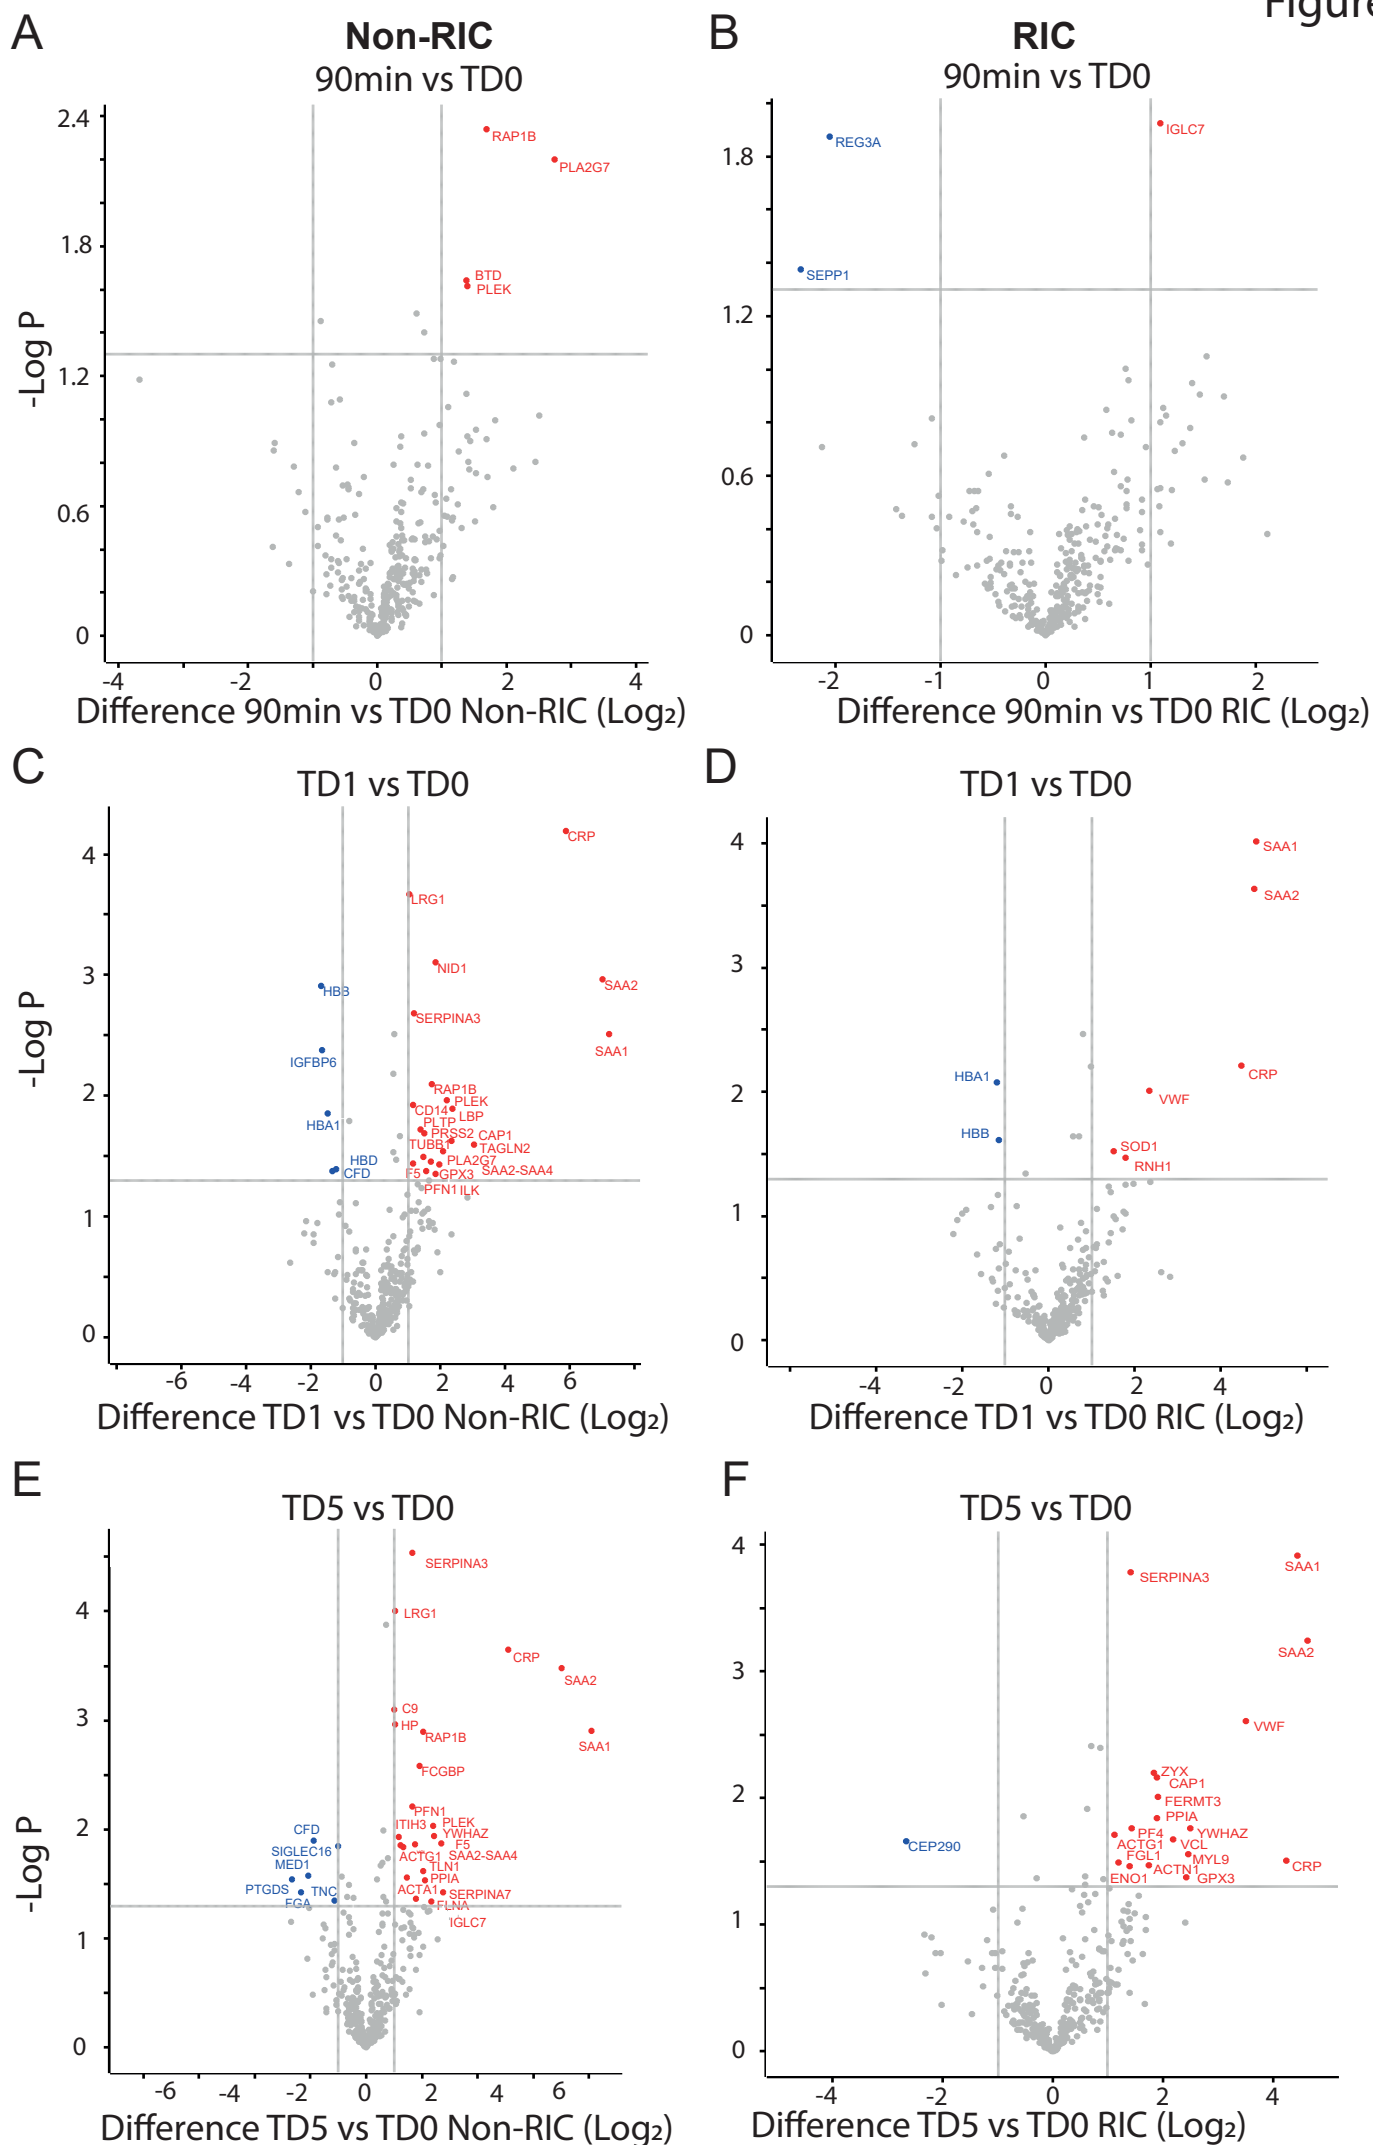

Supplement: 12014_2020_9301_MOESM4_ESM.pdf [file 12014_2020_9301_MOESM4_ESM.pdf]
