# Supplementary material for: Subclinical effects of remote ischaemic conditioning in human kidney transplants revealed by quantitative proteomics
Source: PubMed Central journal article supplement (PMC7607690; doi:10.1186/s12014-020-09301-x), 2020-11-02
Supplement: 12014_2020_9301_MOESM6_ESM.pdf [file 12014_2020_9301_MOESM6_ESM.pdf]

A non-RIC

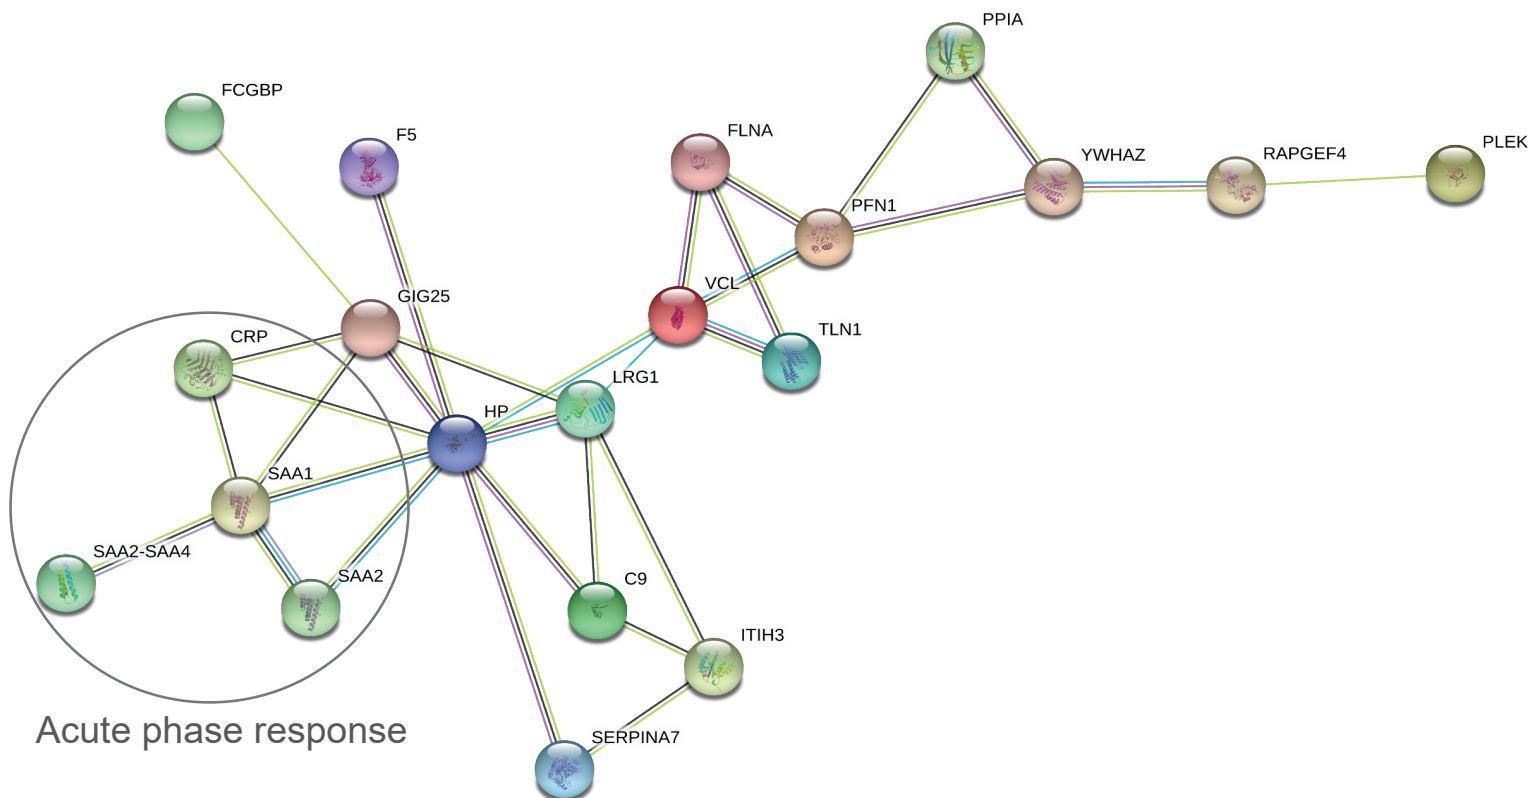

| Biological Process (GO) |                            |                   |                      |
|-------------------------|----------------------------|-------------------|----------------------|
| GO-term                 | description                | count in gene set | false discovery rate |
| GO:0045055              | regulated exocytosis       | 11 of 691         | 1.33e-08             |
| GO:0002576              | platelet degranulation     | 7 of 129          | 2.19e-08             |
| GO:0016192              | vesicle-mediated transport | 13 of 1699        | 1.31e-07             |
| GO:0006953              | acute-phase response       | 5 of 45           | 2.03e-07             |
| GO:0006810              | transport                  | 15 of 4130        | 3.93e-05             |

B RIC

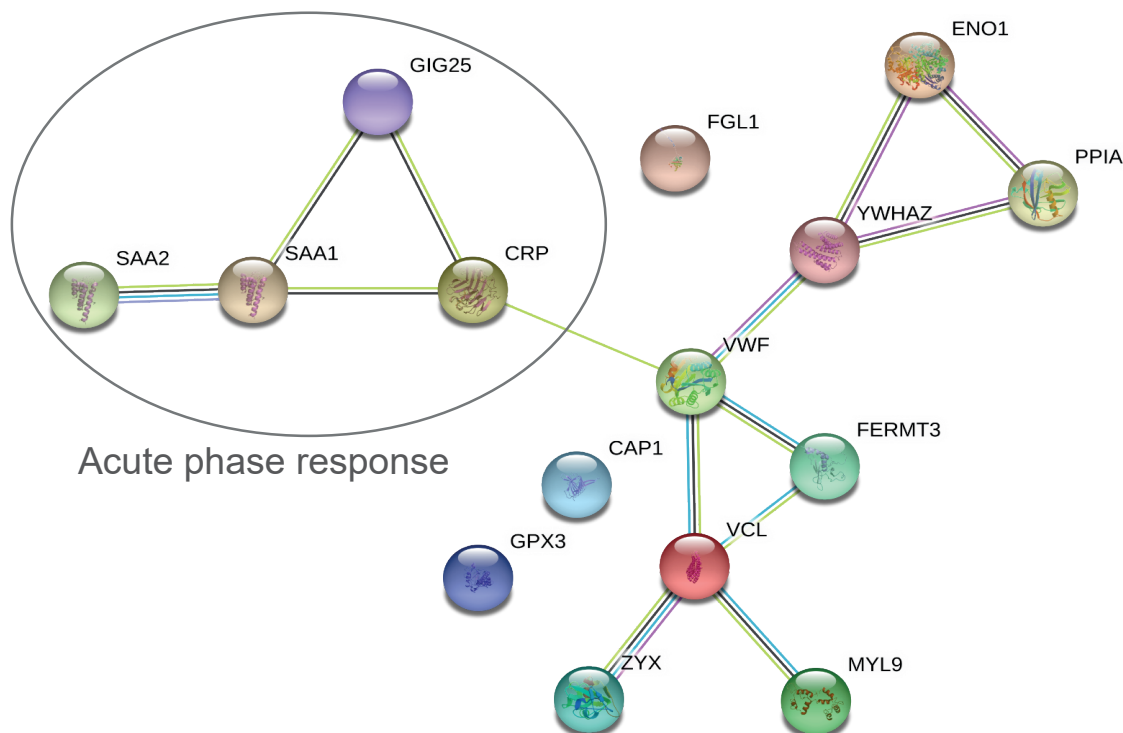

| Biological Process (GO) |                         |                   |                      |
|-------------------------|-------------------------|-------------------|----------------------|
| GO-term                 | description             | count in gene set | false discovery rate |
| GO:0006953              | acute-phase response    | 4 of 45           | 3.27e-05             |
| GO:0002576              | platelet degranulation  | 4 of 129          | 0.00062              |
| GO:0001775              | cell activation         | 7 of 1024         | 0.00086              |
| GO:0045055              | regulated exocytosis    | 6 of 691          | 0.00089              |
| GO:0031589              | cell-substrate adhesion | 4 of 162          | 0.00089              |
